# Supplementary material for: Effects of wear particles of polyether-ether-ketone and cobalt-chromium-molybdenum on CD4- and CD8-T-cell responses
Source: PubMed Central journal article supplement (PMC5834256; doi:10.18632/oncotarget.23757), 2017-12-29
Supplement: oncotarget-09-11197-s001.pdf [file oncotarget-09-11197-s001.pdf]

# Effects of wear particles of polyether-ether-ketone and cobalt-chromium-molybdenum on CD4- and CD8-T-cell responses

## SUPPLEMENTARY MATERIALS

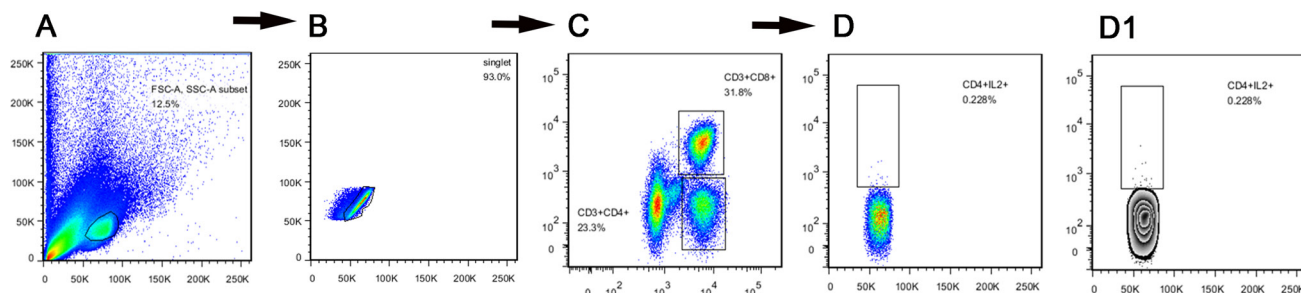

**Supplementary Figure 1: The full gating strategies used in identifying CD4+IL2+ T-cells populations induced by CoCrMo wear particles.** (A) Lymphocyte subsets were delineated. (B) Adherent lymphocytes were removed. (C) CD4+ lymphocyte subsets and CD8+ lymphocyte subsets were respectively delineated. (D) Percentage of lymphocytes secreting IL-2 in CD4+ lymphocyte subsets was delineated (Pseudocolor). (D1) Percentage of lymphocytes secreting IL-2 in CD4+ lymphocyte subsets was delineated (Zebra).

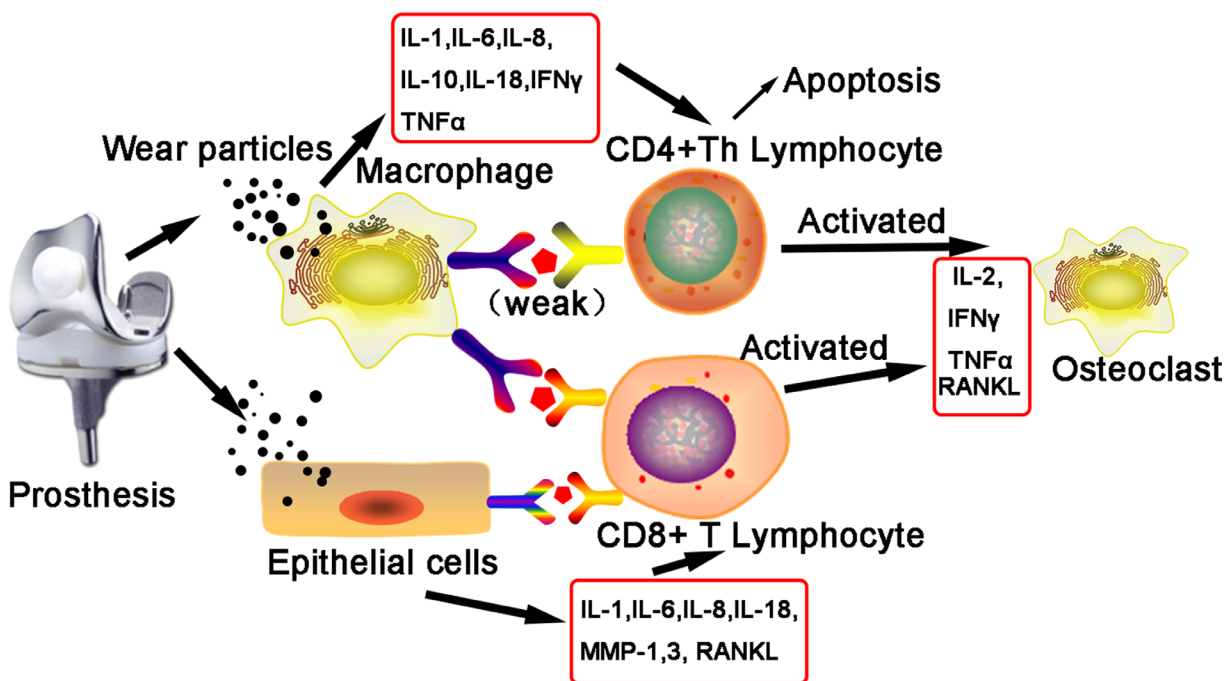

**Supplementary Figure 2: A schematic illustration of the proposed mechanism depicting the effects of wear particles from polymer and metal-based implants on immune responses.**
